# Supplementary material for: The Importance of Porins and β-Lactamase in Outer Membrane Vesicles on the Hydrolysis of β-Lactam Antibiotics
Source: PubMed Central journal article supplement (PMC7215730; doi:10.3390/ijms21082822), 2020-04-17
Supplement: ijms-21-02822-s001.pdf [file ijms-21-02822-s001.pdf]

## Supplementary Materials

**Table S1.** Oligonucleotide primers.

The parts which serve as PCR primers for amplification of the cassette are underlined.

| Description            | Primer                             | Oligonucleotide sequence (5' to 3')                                                    | Fragment size (bp) |
|------------------------|------------------------------------|----------------------------------------------------------------------------------------|--------------------|
| Fragment 1             | pRed N part SacI-F                 | ATGAGCTCGCCATCAGCTCAACCTGTTGAT                                                         | 469                |
|                        | pRed N part Cm <sup>R</sup> -R     | GATTTTTTTCTCCATACACGGTGCCTGACTGCGT                                                     |                    |
| Fragment 2             | pRed N Cm <sup>R</sup> connected-F | GTCAGGCACCGTGTATGGAGAAAAAATCACTGG                                                      | 688                |
|                        | Cm <sup>R</sup> pRed C-R           | CAACGCGGGGAGGCTTACGCCCCGCCCTGCCAC                                                      |                    |
| Fragment 3             | Cm <sup>R</sup> pRed C connected-F | GCGGGGCGTAAGCCTCCCCGCGTTGCGTCG                                                         | 253                |
|                        | pRed C EcoRV-R                     | ATATGATATCATTCCTCCTGATCTCGAACCC                                                        |                    |
| Homology arms for blc1 | FRT blc1 (upper oligo)             | CTGGGTGTGGCATTGATTAACACAGCAGATAATTC<br>GCAAATACTTTATCGA <u>AATTAACCCTCACTAAAGGGCG</u>  | -                  |
|                        | FRT blc1 (lower oligo)             | TAAACGTCGGCTCGGTACGGTCGAGACGGAACGT<br>TTCGTCTCCCAGCTGTTAATACGACTCACTATAGGGCTC          |                    |
| Homology arms for ompC | FRT ompC (upper oligo)             | CTGACAACAAAGATGTAGATGGCGACCAGACCTAC<br>ATGCGTCTTGGCTTCA <u>AATTAACCCTCACTAAAGGGCGG</u> | -                  |
|                        | FRT ompC (lower oligo)             | TACTGAACAGCAAAGTTCAGGCCGTCAACCAGACC<br>GAAGAAGTCAGTGTTAATACGACTCACTATAGGGCTCG          |                    |
| Homology arms for ompF | FRT ompF (upper oligo)             | CGTAACTACGGTGTGGTTTATGATGCACTGGGTTAC<br>ACCGATATGCTGCCA <u>AATTAACCCTCACTAAAGGGCG</u>  | -                  |
|                        | FRT ompF (lower oligo)             | CAGGTAGATGTTGTTTCGCGTCATACTTCAGACCAGT<br>AGCCCACTGTTTCAGTAATACGACTCACTATAGGGCTC        |                    |

**Table S2.** The MIC of  $\beta$ -lactam antibiotics against the  $\beta$ -lactam-susceptible *Escherichia coli* (RC85).

| Antibiotics  | MIC                               |
|--------------|-----------------------------------|
|              | ( $\mu\text{g/mL}$ ) <sup>a</sup> |
| Ampicillin   | 8                                 |
| Cefotaxime   | $\leq 1/4$                        |
| Cefoperazone | $\leq 1/4$                        |
| Amoxicillin  | 4                                 |
| Cefazolin    | 1                                 |
| Cefalexin    | 4                                 |

<sup>a</sup>MIC indicates minimum inhibitory concentration

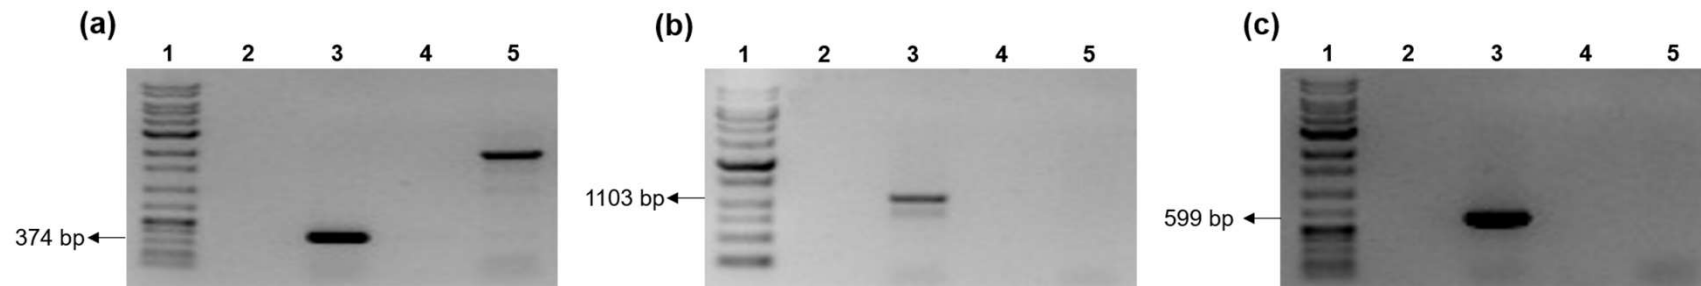

**Figure S1.** Gene deletion profile analysis in *blc1* (a), *ompC* (b), and *ompF* (c) using colony PCR followed by 1% agarose gel electrophoresis.

Lane 1: molecular weight marker; lane 2: DNA blank; 3: RC85<sup>+</sup>; 4: DNA blank; 5: mutant strain.

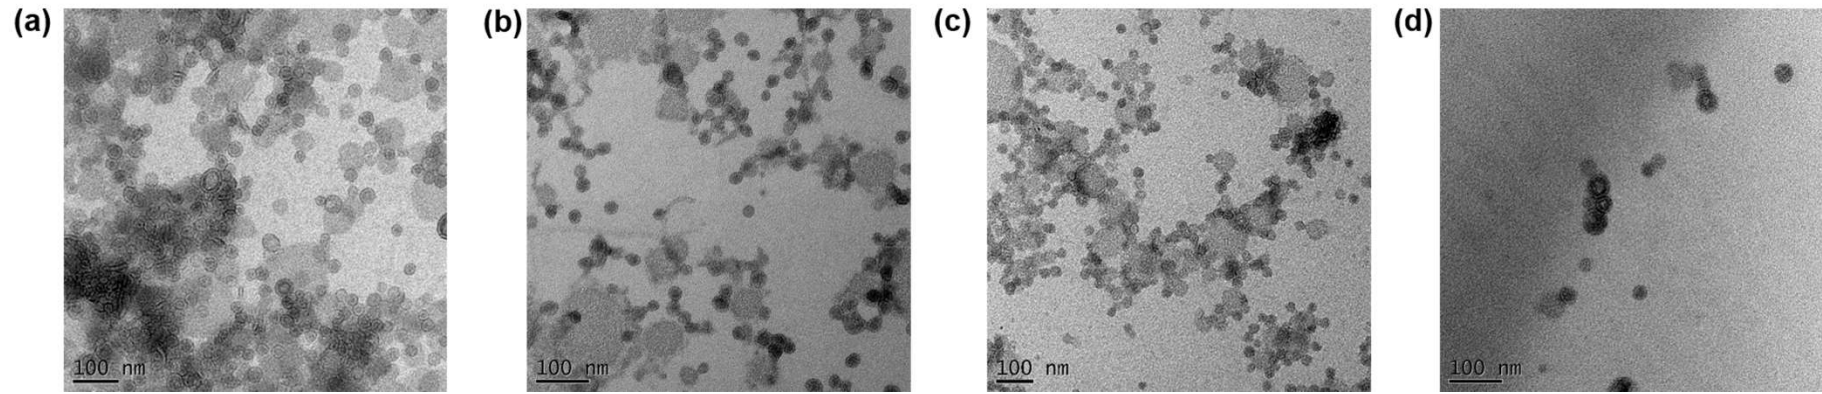

**Figure S2.** TEM images of OMVs released from RC85<sup>+</sup> (a),  $\Delta$ blc1 (b),  $\Delta$ ompC (c), and  $\Delta$ ompF (d) cells. Bar = 100 nm.

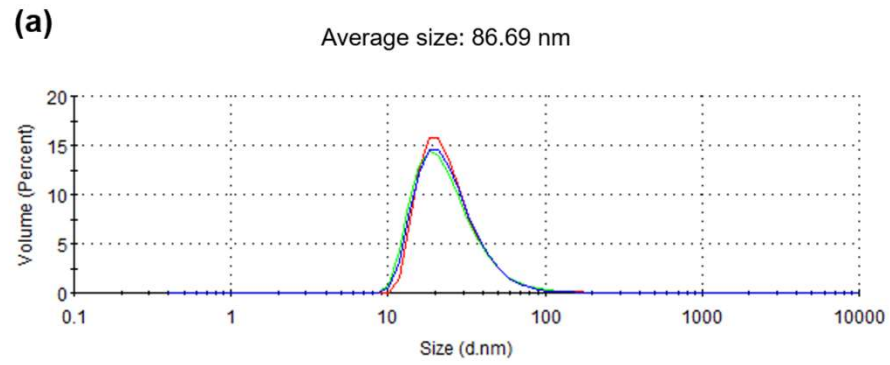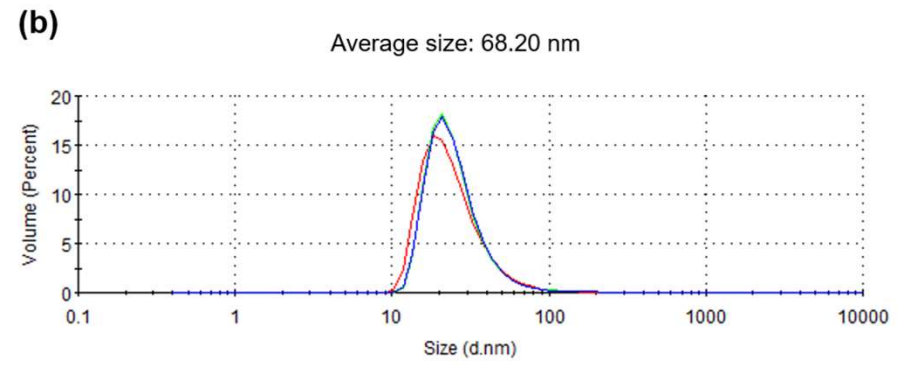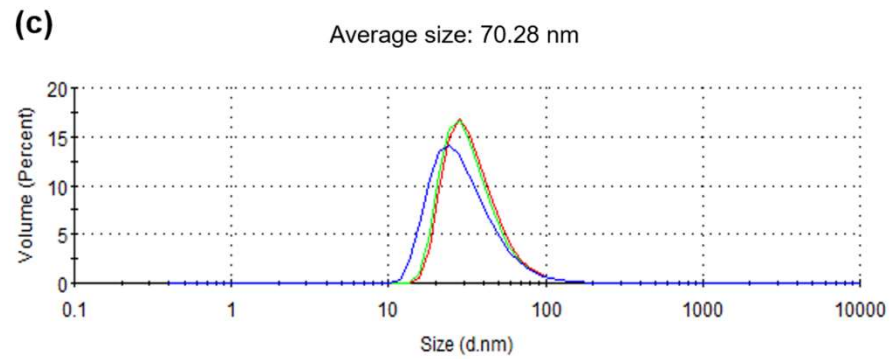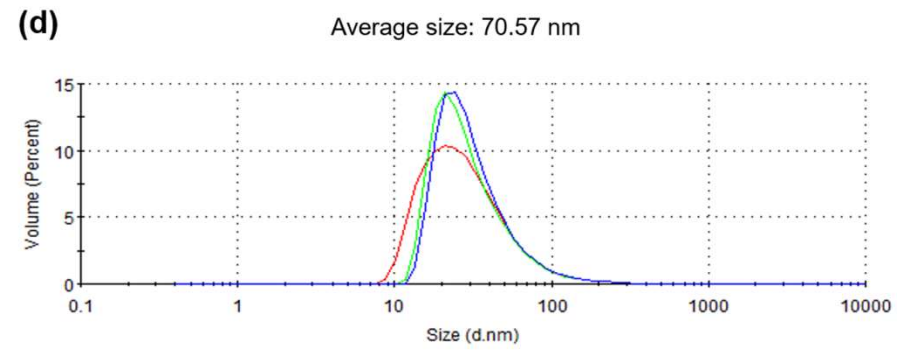

**Figure S3.** The size distribution OMVs derived from RC85<sup>+</sup> (a),  $\Delta$ blc1 (b),  $\Delta$ ompC (c), and  $\Delta$ ompF (d) cells, as assessed by Zeta-sizer. Three independent measurements were performed.
